# Supplementary material
Source: PubMed Central journal article supplement (PMC4449797)
Supplement: NIHMS651354-supplement-01.pdf [file NIHMS651354-supplement-01.pdf]

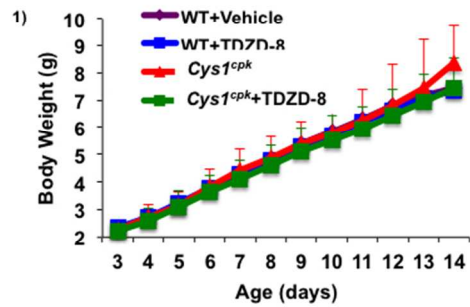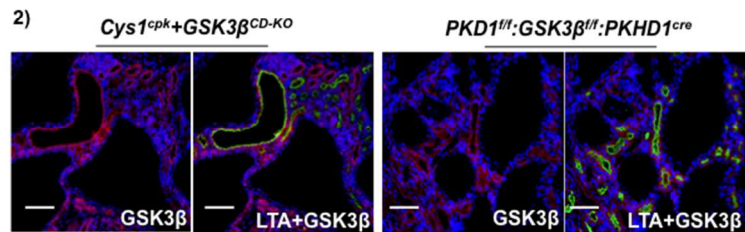

**Supplemental-1:** Bodyweight of WT and *Cys1<sup>cpk</sup>* mice treated with vehicle or TDZD-8 from P3 to P14 showed no significant change.

**Supplemental-2:** Renal GSK3 $\beta$  expression (red) in proximal tubules (green) of *Cys1<sup>cpk</sup>*+*GSK3 $\beta$ <sup>CD-KO</sup>* and *PKD1<sup>fl/fl</sup>*:*GSK3 $\beta$ <sup>fl/fl</sup>*:*PKHD1<sup>cre</sup>* mice in which GSK3 $\beta$  is knocked out in the renal collecting duct. (Scale bar=50 $\mu$ m).

60x81mm (300 x 300 DPI)

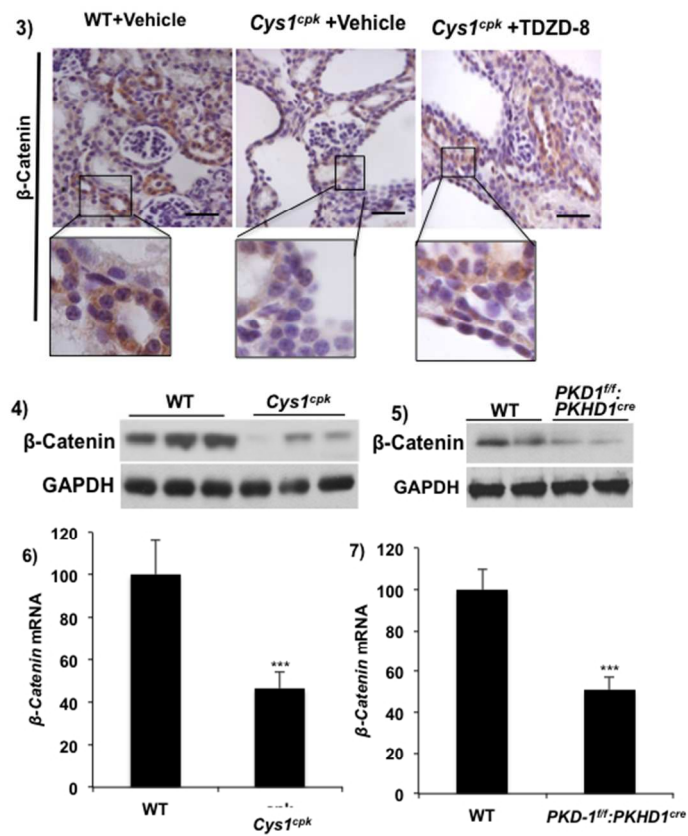

**Supplemental 3:** β-Catenin immunostaining (brown) was reduced in *Cys1<sup>cpk</sup>*+vehicle compared to WT+vehicle kidneys. In the *Cys1<sup>cpk</sup>*+TDZD-8 kidneys, more cytoplasmic staining for β-Catenin was observed. (Scale bar=25μm)

**Supplemental 4:** β-catenin protein levels at P14 are lower in the *Cys1<sup>cpk</sup>* kidneys than in WT kidneys. Samples same as used in Fig-1a.

**Supplemental 5:** β-catenin protein levels at P21 are lower in the *PKD1<sup>fl/fl</sup>:PKHD1<sup>cre</sup>* kidneys than in WT kidneys. Samples same as used in Fig-1a.

**Supplemental 6:** β-catenin mRNA levels in WT and *Cys1<sup>cpk</sup>* mice. (\*\*\*)P<0.001, n=7/ group). Samples same as used in Fig-1d.

**Supplemental 7:** β-catenin mRNA levels in WT and *PKD1<sup>fl/fl</sup>:PKHD1<sup>cre</sup>* mice (\*\*\*)P<0.001, n= 7/ group). Samples same as used in Fig-1e.

60x81mm (300 x 300 DPI)

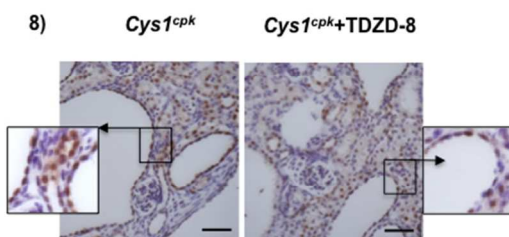

**Supplemental-8:** *Cys1<sup>cpk</sup>* mice treated with vehicle or TDZD-8 from P3 to P14 showed increased immunostaining for Cyclin D1 in the cyst lining epithelium. (Scale bar=25 $\mu$ m).

60x81mm (300 x 300 DPI)
